# Supplementary material for: Flotillin-2 is associated with breast cancer progression and poor survival outcomes
Source: PubMed Central journal article supplement (PMC3765773; doi:10.1186/1479-5876-11-190), 2013-08-15
Supplement: 1479-5876-11-190-S1.pdf [file 1479-5876-11-190-S1.pdf]

## Supplementary Information

*Supplementary Table 1.* Primer sequences used real-time quantitative reverse transcription-PCR (5' to 3')

| Gene  | Forward primer         | Reverse primer        |
|-------|------------------------|-----------------------|
| FLOT2 | TTGCTGACTCTAAGCGAGCC   | TCCACGGCAATCTGTTTCTTG |
| GAPDH | GACTCATGACCACAGTCCATGC | AGAGGCAGGGATGATGTTCTG |

*Supplementary Table 2.* Adjuvant treatments categories of the patients

|              | Number of cases (%) |           |
|--------------|---------------------|-----------|
|              | +                   | -         |
| chemotherapy | 143(83.6)           | 28(16.4)  |
| endocrine    | 89(52.0)            | 82(48.0)  |
| trastuzumab  | 17(10.0)            | 154(90.0) |
